# Supplementary material
Source: publisher figshare collection journal article supplement (https://tandf.figshare.com/ndownloader/files/17617589)
Supplement: Supplementary file [file 17617589]

# **A smart glove with integrated triboelectric nanogenerator for self-powered gesture recognition and language expression**

Che-Min Chiu<sup>1,#</sup>, Shuo-Wen Chen<sup>1,#</sup>, Yu-Ping Pao<sup>1</sup>, Ming-Zheng Huang<sup>1</sup>,  
Shuen-Wen Chan<sup>1</sup> and Zong-Hong Lin<sup>1,2,3,\*</sup>

<sup>1</sup> *Institute of Biomedical Engineering, National Tsing Hua University, Hsinchu 30013, Taiwan.*

<sup>2</sup> *Department of Power Mechanical Engineering, National Tsing Hua University, Hsinchu, 30013, Taiwan.*

<sup>3</sup> *Frontier Research Center on Fundamental and Applied Sciences of Matters, National Tsing Hua University, Hsinchu, 30013, Taiwan*

\* Correspondence: [linzh@mx.nthu.edu.tw](mailto:linzh@mx.nthu.edu.tw); Tel.: +886-03-5715-131#35502

# These authors contributed equally to this work.

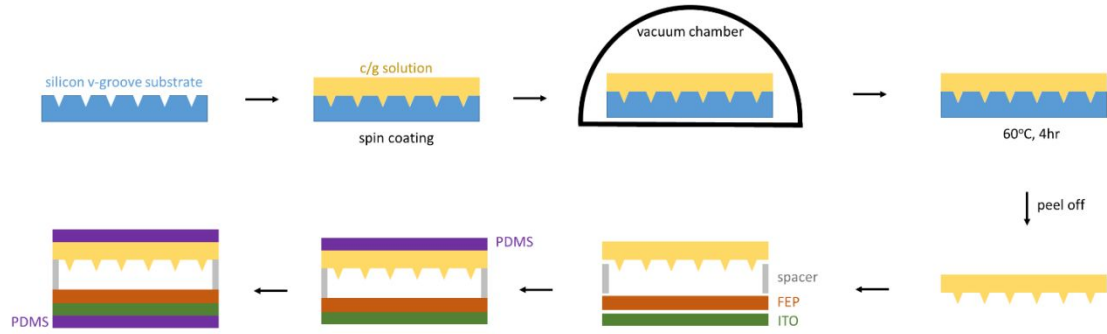

**Figure S1.** Fabrication process of the TENG. The chitosan/glycerol solutions were spin coated on a silicon v-groove substrate and then put into a vacuum chamber. Later, the sample was put into a hot circulator exact oven at 60 °C for 4 hours. Then, the c/g film was peeled off from the substrate and attached to a donut-shaped double-sided adhesive FEP film, and subsequently to an ITO film. Finally, PDMS mixture was dispensed onto the ITO films and cured at 60 °C to form the substrate for the device.

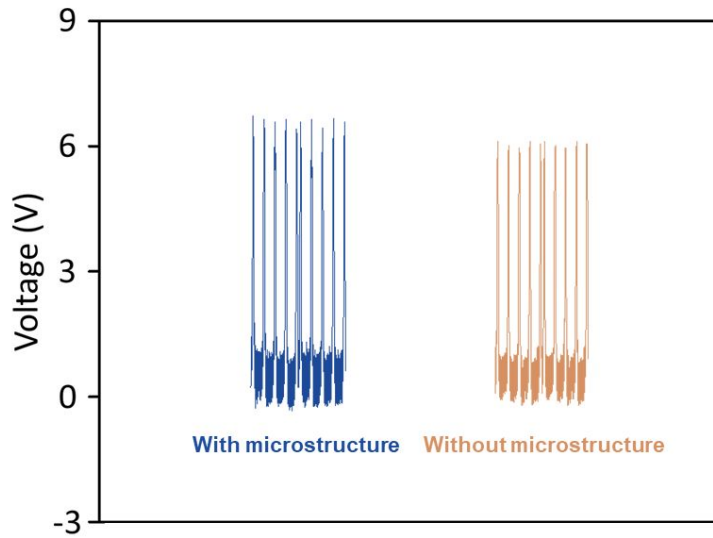

**Figure S2.** Measurement of electric output characteristics of the TENG with and without microstructure.

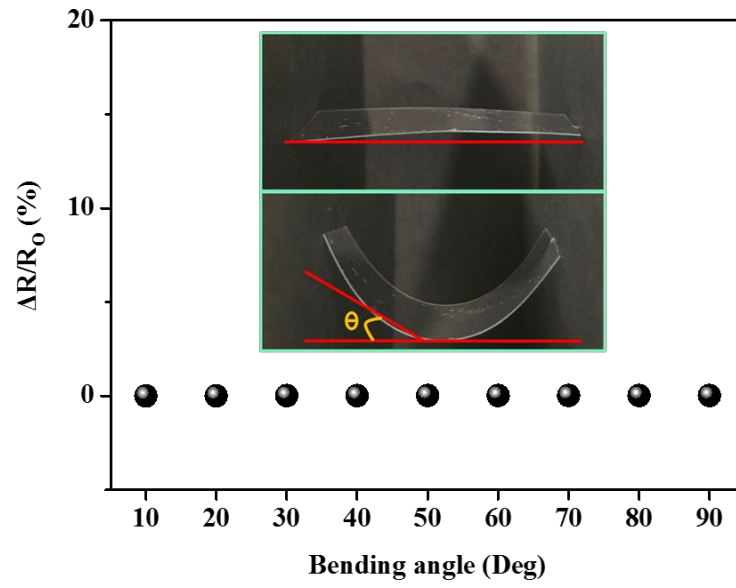

**Figure S3.** The effect of different resistance on the bending angle performance of the ITO electrode.

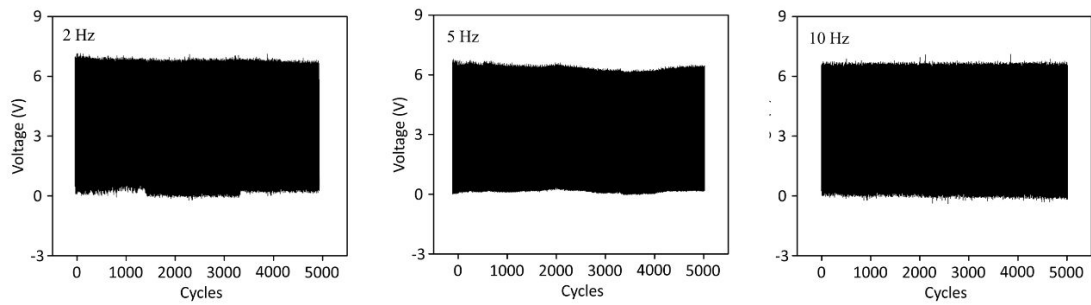

**Figure S4.** Durability test of the TENG under 5000 cycles when the operating frequency is at 2 Hz, 5 Hz and 10 Hz.

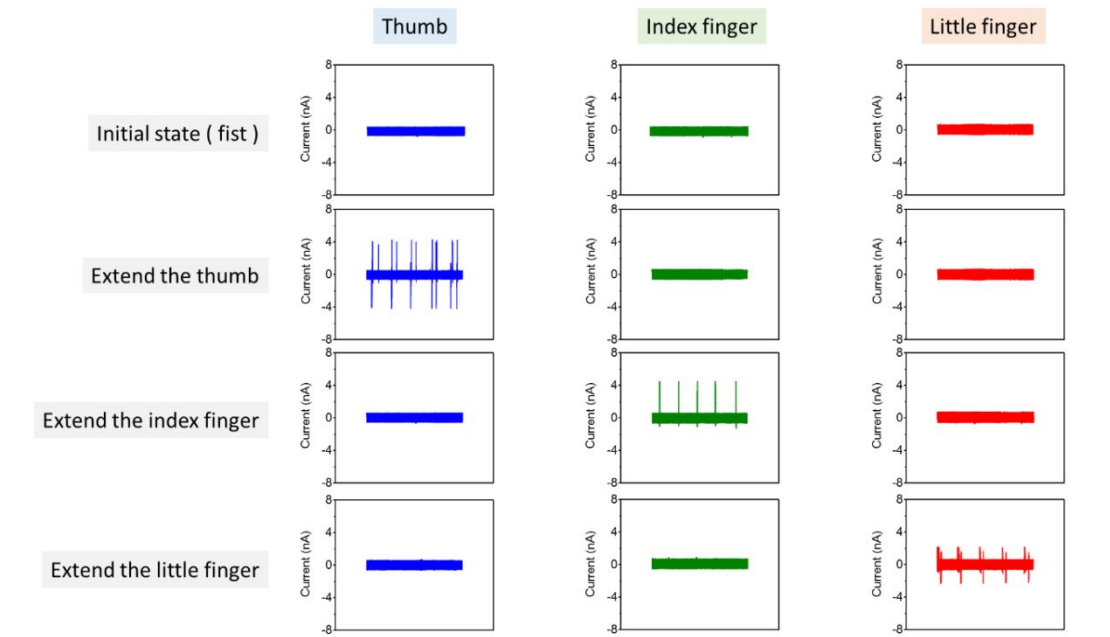

**Figure S5.** Outputs current of the three TENG mounted on the tendon corresponding to the thumb (blue), the index finger (green), and the little finger (red) when moving different fingers.

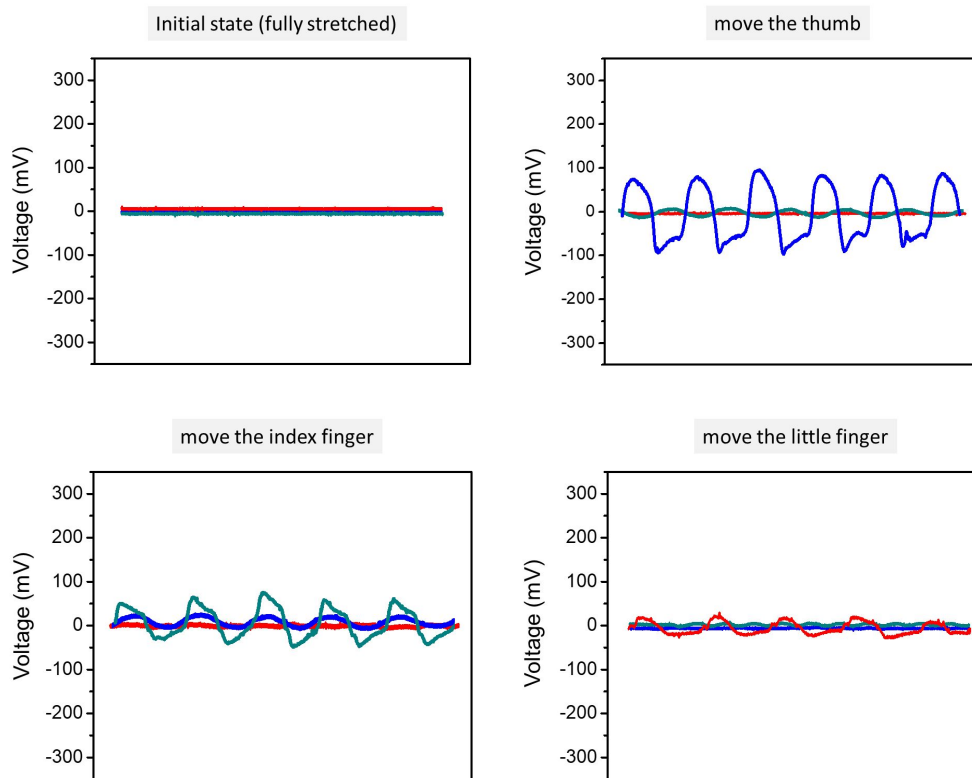

**Figure S6.** Electrical outputs of the three TENG mounted on the tendon corresponding to the thumb (blue), the index finger (green), and the little finger (red) when moving different fingers.

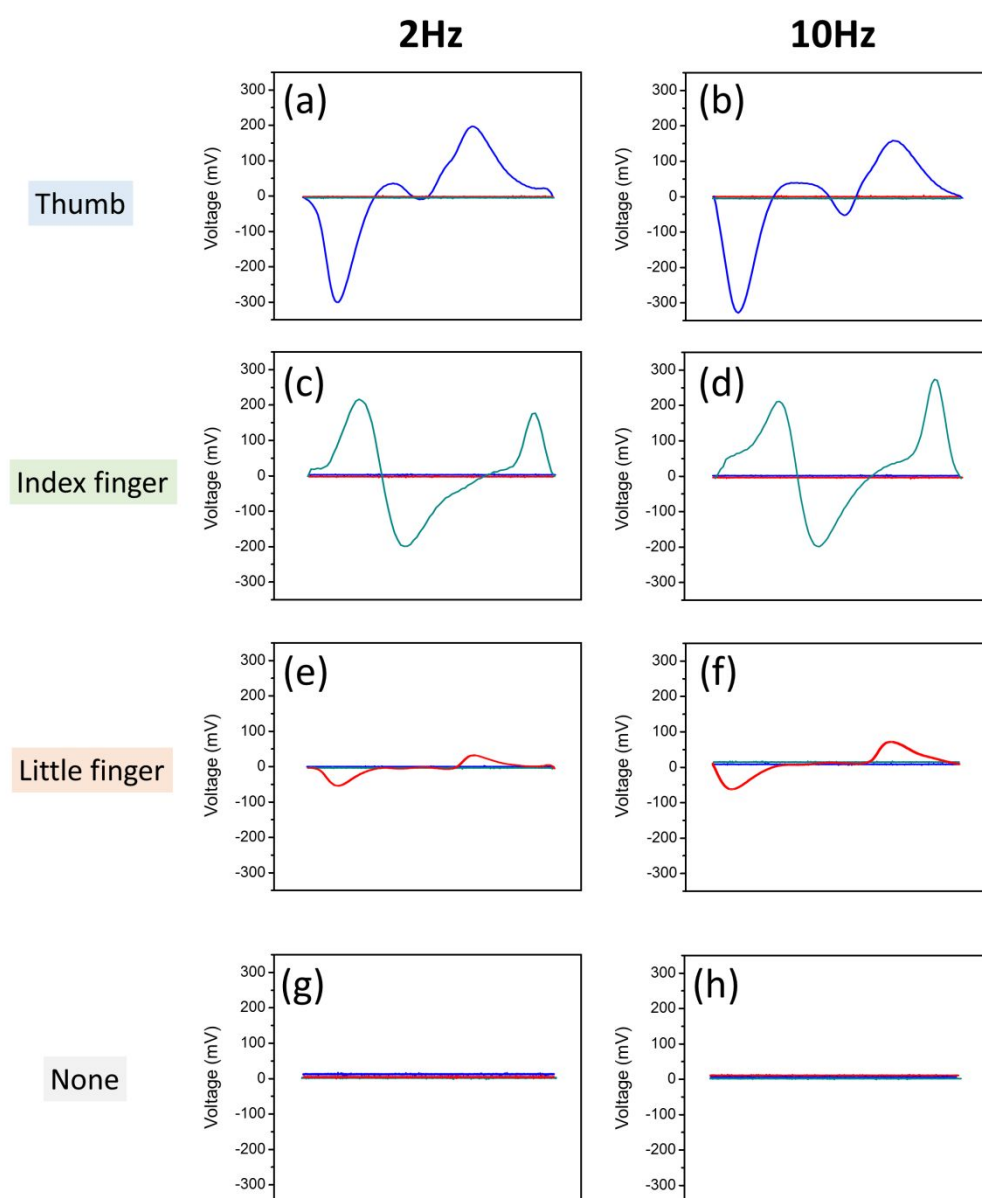

**Figure S7.** Electrical output of the TENG after operating 5000 cycles at 2 Hz and 10 Hz.
